# Supplementary material
Source: PubMed Central journal article supplement (PMC3324800)
Supplement: 10.3163.1536-5050.100.2.008.sg001.pdf [file 10.3163.1536-5050.100.2.008.sg001.pdf]

**Provision of pandemic information by health sciences librarians: a multisite comparative case series**

**Robin M. Featherstone, MLIS; R. Gabriel Boldt, MScEd, MLIS; Nazi Torabi, MSc, MLIS; Shauna-Lee Konrad, MLIS**

**APPENDIX A**

**Pandemic information needs: detailed reference survey**

Thank you for helping us to understand information needs during a pandemic situation. Results from these surveys will inform the provision of needed information during an outbreak.

Please fill out this survey to record information about any questions you received on the topic of H1N1 influenza A (also known as “swine flu”). Please fill out the survey as soon as possible following the transaction.

Do not include any identifying information about yourself or the patron.

Questions about the survey can be sent to Robin Featherstone, c/o Taylor Library, University of Western Ontario ([rfeathe@uwo.ca](mailto:rfeathe@uwo.ca)), or Gabriel Boldt, c/o Health Sciences Library, London Regional Cancer Program ([Gabriel.boldt@lhsc.on.ca](mailto:Gabriel.boldt@lhsc.on.ca)).

This 3-page survey has 7 questions and should take about 5 minutes to complete.

1. What was the date and time the question was asked?

(Please use the form: Jan 1, 2009 @ 2:30 pm) \_\_\_\_\_

2. Who asked the question?

Clinical doctor  Patient  Other (please specify): \_\_\_\_\_  
Intern  Researcher   
Nurse  Resident

3. What kind of information did they require? Check all that apply.

|                                                    |                          |                                                                                       |                          |                         |                          |
|----------------------------------------------------|--------------------------|---------------------------------------------------------------------------------------|--------------------------|-------------------------|--------------------------|
| Clinical manifestations                            | <input type="checkbox"/> | Diagnosis                                                                             | <input type="checkbox"/> | Prevention              | <input type="checkbox"/> |
| Complications                                      | <input type="checkbox"/> | Influenza etiology (i.e., cause or origin of the virus)                               | <input type="checkbox"/> | Treatment               | <input type="checkbox"/> |
| Demographic or statistical (i.e., population data) | <input type="checkbox"/> | Influenza epidemiology (i.e., spread of the virus, including morbidity and mortality) | <input type="checkbox"/> | Other (please specify): | _____                    |

4. What source was used to answer the question? Check all that apply.

|                                                      |                          |                                                      |                          |                                                   |                          |
|------------------------------------------------------|--------------------------|------------------------------------------------------|--------------------------|---------------------------------------------------|--------------------------|
| Clinical support tool (i.e., UpToDate)               | <input type="checkbox"/> | International news (i.e., BBC)                       | <input type="checkbox"/> | Print journal (i.e., American Journal of Nursing) | <input type="checkbox"/> |
| Database (i.e., PubMed)                              | <input type="checkbox"/> | Local news (i.e., <i>London Free Press</i> )         | <input type="checkbox"/> | Print textbook (i.e., <i>Harrisons</i> )          | <input type="checkbox"/> |
| Evidence-based medicine reviews (i.e., Cochrane)     | <input type="checkbox"/> | National news (i.e., CBC News)                       | <input type="checkbox"/> | Other (please specify):                           | _____                    |
| Electronic textbook (i.e., <i>Harrisons Online</i> ) | <input type="checkbox"/> | NGO document (i.e., World Health Organization [WHO]) | <input type="checkbox"/> |                                                   |                          |

- |                                                                                |                          |                                                                                               |                          |
|--------------------------------------------------------------------------------|--------------------------|-----------------------------------------------------------------------------------------------|--------------------------|
| Federal government document (i.e., Centers for Disease Control and Prevention) | <input type="checkbox"/> | Online journal (i.e., Disease Management)                                                     | <input type="checkbox"/> |
| Internal report (i.e., hospital memorandum)                                    | <input type="checkbox"/> | Provincial or state government document (i.e., Ontario Ministry of Health and Long-Term Care) | <input type="checkbox"/> |

5. When was the information needed?

- |                    |                          |                   |                          |                                                                |
|--------------------|--------------------------|-------------------|--------------------------|----------------------------------------------------------------|
| Immediately        | <input type="checkbox"/> | Within 48 hours   | <input type="checkbox"/> | Additional comments about the urgency of the request:<br>_____ |
| Within a few hours | <input type="checkbox"/> | Within one week   | <input type="checkbox"/> |                                                                |
| Within 24 hours    | <input type="checkbox"/> | No deadline given | <input type="checkbox"/> |                                                                |

6. How did you receive the information request?

- |                      |                          |                                              |                          |                                  |
|----------------------|--------------------------|----------------------------------------------|--------------------------|----------------------------------|
| By email             | <input type="checkbox"/> | In person at another location in the library | <input type="checkbox"/> | Other (please specify):<br>_____ |
| By instant messenger | <input type="checkbox"/> | In person at the reference desk              | <input type="checkbox"/> |                                  |
| By phone             | <input type="checkbox"/> |                                              |                          |                                  |

7. Please share any other details about the information transaction that were not captured above:

---

Thank you for your participation.

Finished reference surveys can be returned to Robin Featherstone, c/o Taylor Library, University of Western Ontario ([rfeathe@uwo.ca](mailto:rfeathe@uwo.ca)), or Gabriel Boldt, c/o Health Sciences Library, London Regional Cancer Program ([Gabriel.boldt@lhsc.on.ca](mailto:Gabriel.boldt@lhsc.on.ca)).
